# Supplementary material
Source: PubMed Central journal article supplement (PMC8262378)

**PRODUCT INFORMATION**

|                     |                         |          |                      |
|---------------------|-------------------------|----------|----------------------|
| Cell Line           | NEK1 knockout cell line | Genotype | CRISPR / Cas9-edited |
| Product ID          | HZGHC000344c010         | Parental | HAP1                 |
| Date of Manufacture | 2015-08-05              | Passage  | 7                    |

**PROPERTIES**

|                    |                              |
|--------------------|------------------------------|
| Total Cells        | 1x10 <sup>6</sup>            |
| Volume / Ampoule   | 0.4 ml                       |
| Storage Conditions | Liquid Nitrogen vapour phase |

**QUALITY CONTROL**

| TEST                       | TEST METHOD                    | PASS/FAIL |
|----------------------------|--------------------------------|-----------|
| Viability                  | Post thawing culture           | Pass      |
| Mycoplasma                 | MYCOPLASMACHECK (GATC Biotech) | Pass      |
| Cell line Characterisation | Sanger Sequencing (DNA)        | Pass      |

**GROWTH CONDITIONS**

|                            |                                                                                                                                                                                              |
|----------------------------|----------------------------------------------------------------------------------------------------------------------------------------------------------------------------------------------|
| Recommended culture media  | Iscove's Modified Dulbecco's Medium (IMDM) supplemented with 10 % FCS, 100 U/ml Penicilin and 100 µg/ml Streptomycin                                                                         |
| Subculture                 | Cells are cultured as a monolayer at 37°C in a humidified atmosphere with 5% CO <sub>2</sub> . Cells should be passaged every 2-3 days. Split at 70-75% confluency, approximately 1:10-1:15. |
| Cell line revival          | Rapidly thaw cells in a 37°C water bath. Transfer contents into a tube containing pre-warmed media. Centrifuge cells and seed into a 75cm <sup>2</sup> flask containing pre-warmed media.    |
| Recommended freezing media | IMDM + 20 % FCS + 10 % DMSO                                                                                                                                                                  |

### CELL LINE CHARACTERIZATION (DNA)

|                         |                          |                          |                        |
|-------------------------|--------------------------|--------------------------|------------------------|
| Target Gene             | NEK1                     | Mutation                 | 2bp deletion in exon 4 |
| Guide RNA Sequence      | ATAGTAATGGATTACTGTGA     | Genomic location         | chr4:169599161         |
| Target Transcript       | NM_001199400             |                          |                        |
| Synonyms                | NY-REN-55, SRPS2, SRPS2A |                          |                        |
| Forward Primer          | Reverse Primer           | Sequencing Primer        |                        |
| AAGGTGGCAGCTAATTAGAGGTA | GCCCTAATTCTTTGAGTATGGTCC | GCCCTAATTCTTTGAGTATGGTCC |                        |

### Sequencing result

CCTAATNCTTTTGGAGTATGGTCTGTTTTTGTTCAGCAGCTGCTTTTGTAGTAAGCTTTTAAGTACTTTTAATTTAGCCATGCTTTTGT  
 ATGTACGTTTTAAAAGTGGACTGTAATGTTTATATTTGTAGAAAATGGCTCTCTCTACATAGTAATGGATTACTGAGGGAGGGGA  
 TCTGTTTAAAGCGAATAAATGCTCAGAAAGGCGTTTTGTTTCAAGAGGATCAGGTAAGTTTGCATTTAGGAAATTGACTCTTACTCTA  
 TTATTGAGAAGTAGTTCAAAATTTGTTTATGTGTGATTTGTTTTAACTACAAATGCTAATCAAAAATTACTAGGGAAGTTTAGTATN  
 NC

### Transcript Plot

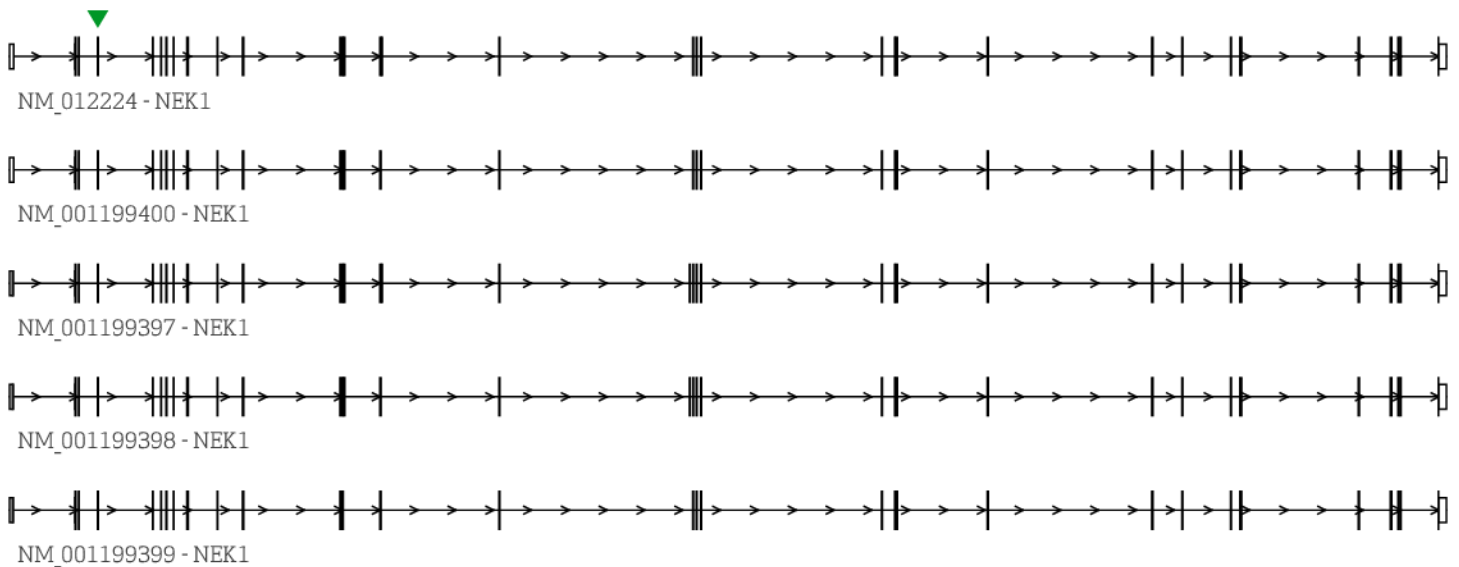

Supplement: geab011_suppl_supplementary_figure_s1.pdf [file geab011_suppl_supplementary_figure_s1.pdf]
